# Supplementary material for: Health Facilities Readiness and Determinants to Manage Cardiovascular Disease in Afghanistan, Bangladesh, and Nepal: Evidence from the National Service Provision Assessment Survey
Source: PubMed Central journal article supplement (PMC10959132; doi:10.5334/gh.1311), 2024-03-20
Supplement: gh-19-1-1311-s1.pdf [file gh-19-1-1311-s1.pdf]

**S1 Table** Survey details of Afghanistan Service Provision Assessment Survey 2018-19, Bangladesh Health Facility Survey 2017, and Nepal Health Facility Survey 2021

| Country     | Survey year | Name of the survey                              | Facilities selected for the survey sample                                                                                                                                                                                                                                    |
|-------------|-------------|-------------------------------------------------|------------------------------------------------------------------------------------------------------------------------------------------------------------------------------------------------------------------------------------------------------------------------------|
| Afghanistan | 2018–19     | Afghanistan Service Provision Assessment survey | Census of public hospitals. private hospitals and NGO/private clinics in six provinces namely Nangarhar, Paktya, Kunduz, Balkh, Kandahar, and Herat. In Kabul province there was a census of public hospitals. private hospitals and random selection of NGO/private clinics |
| Bangladesh  | 2017        | Bangladesh Health Facility Survey               | Combining a census of public hospitals (district hospitals and mother and child welfare centers) with random sampling of other public hospitals, private hospitals, and NGO/private clinics                                                                                  |
| Nepal       | 2021        | Nepal Health Facility Survey                    | Census of public hospitals, private hospitals, and NGO/private clinics                                                                                                                                                                                                       |
